# Supplementary material for: Application of Thermally Fluorinated Multi-Wall Carbon Nanotubes as an Additive to an Li4Ti5O12 Lithium Ion Battery
Source: MDPI journal article supplement (doi:10.3390/nano13060995), 2023-03-09
Supplement: s1 [file s1]

Supplementary Materials

# Application of Thermally Fluorinated Multi-Wall Carbon Nanotubes as an Additive to an $\text{Li}_4\text{Ti}_5\text{O}_{12}$ Lithium Ion Battery

Seongmin Ha <sup>1</sup>, Seo Gyeong Jeong <sup>1</sup>, Chaehun Lim <sup>1</sup>, Chung Gi Min <sup>1</sup> and Young-Seak Lee <sup>1,2,\*</sup>

<sup>1</sup> Department of Chemical Engineering and Applied Chemistry, Chungnam National University, Daejeon 34134, Republic of Korea; haseongmin93@cnu.ac.kr (S.H.)

<sup>2</sup> Institute of Carbon Fusion Technology (InCFT), Chungnam National University, Daejeon 34134, Republic of Korea

\* Correspondence: youngslee@cnu.ac.kr

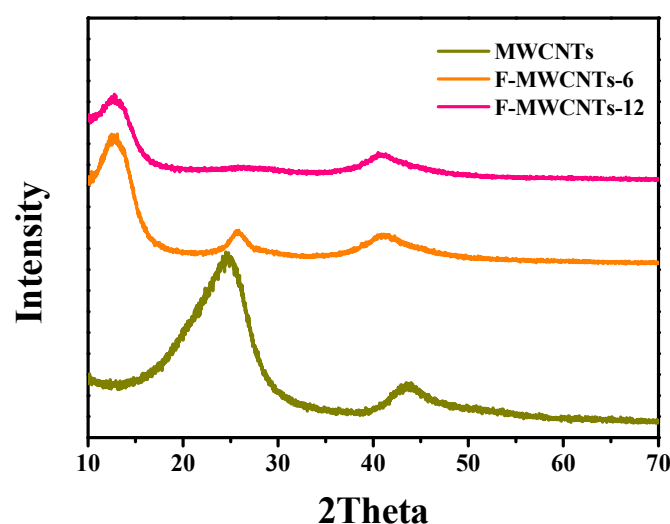

**Figure S1.** X-ray diffraction (XRD) patterns of MWCNTs, F-MWCNTs<sub>6</sub>, and F-MWCNTs<sub>12</sub>.

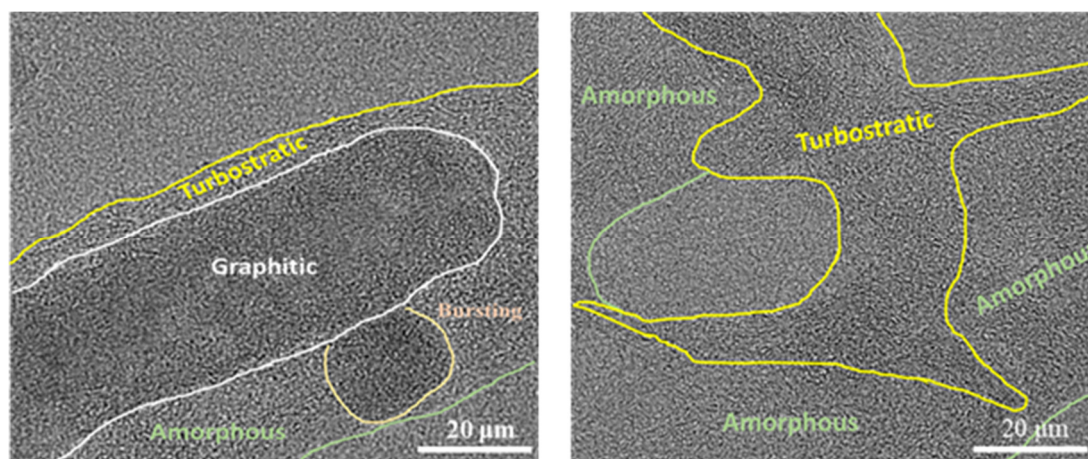

**Figure S2.** TEM images of MWCNTs, F-MWCNTs<sub>6</sub>, and F-MWCNTs<sub>12</sub>.

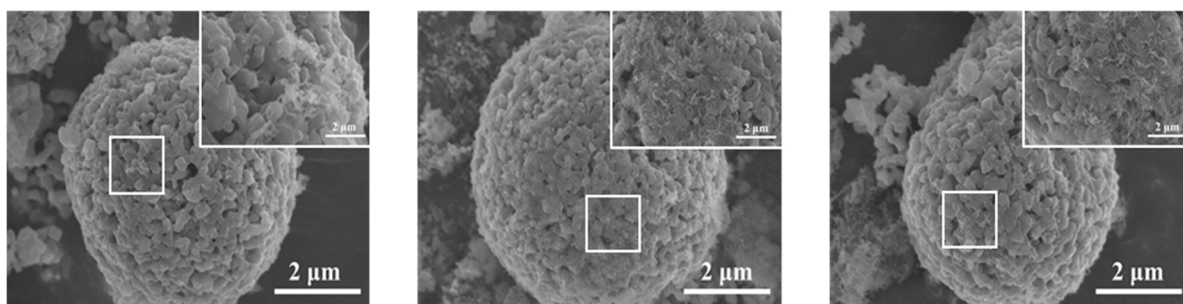

Figure S3. SEM images of MWCNTs, F-MWCNTs\_6, and F-MWCNTs\_12.

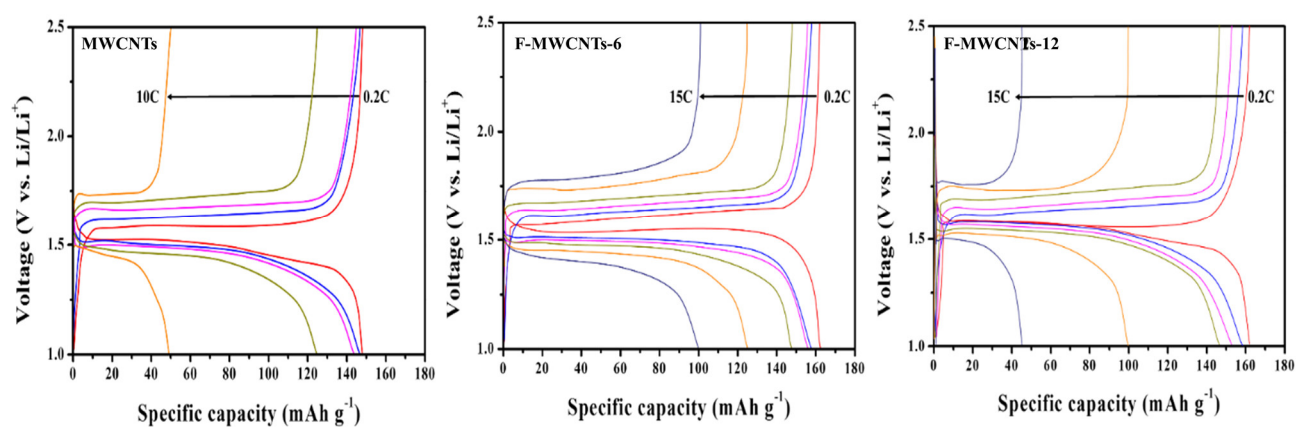

Figure S4. Galvanostatic charge/discharge curves of MWCNTs, F-MWCNTs\_6, and F-MWCNTs\_12 at various rates (0.2, 1, 2, 5, 10, 15 C).
